# Supplementary material
Source: PubMed Central journal article supplement (PMC8632667)

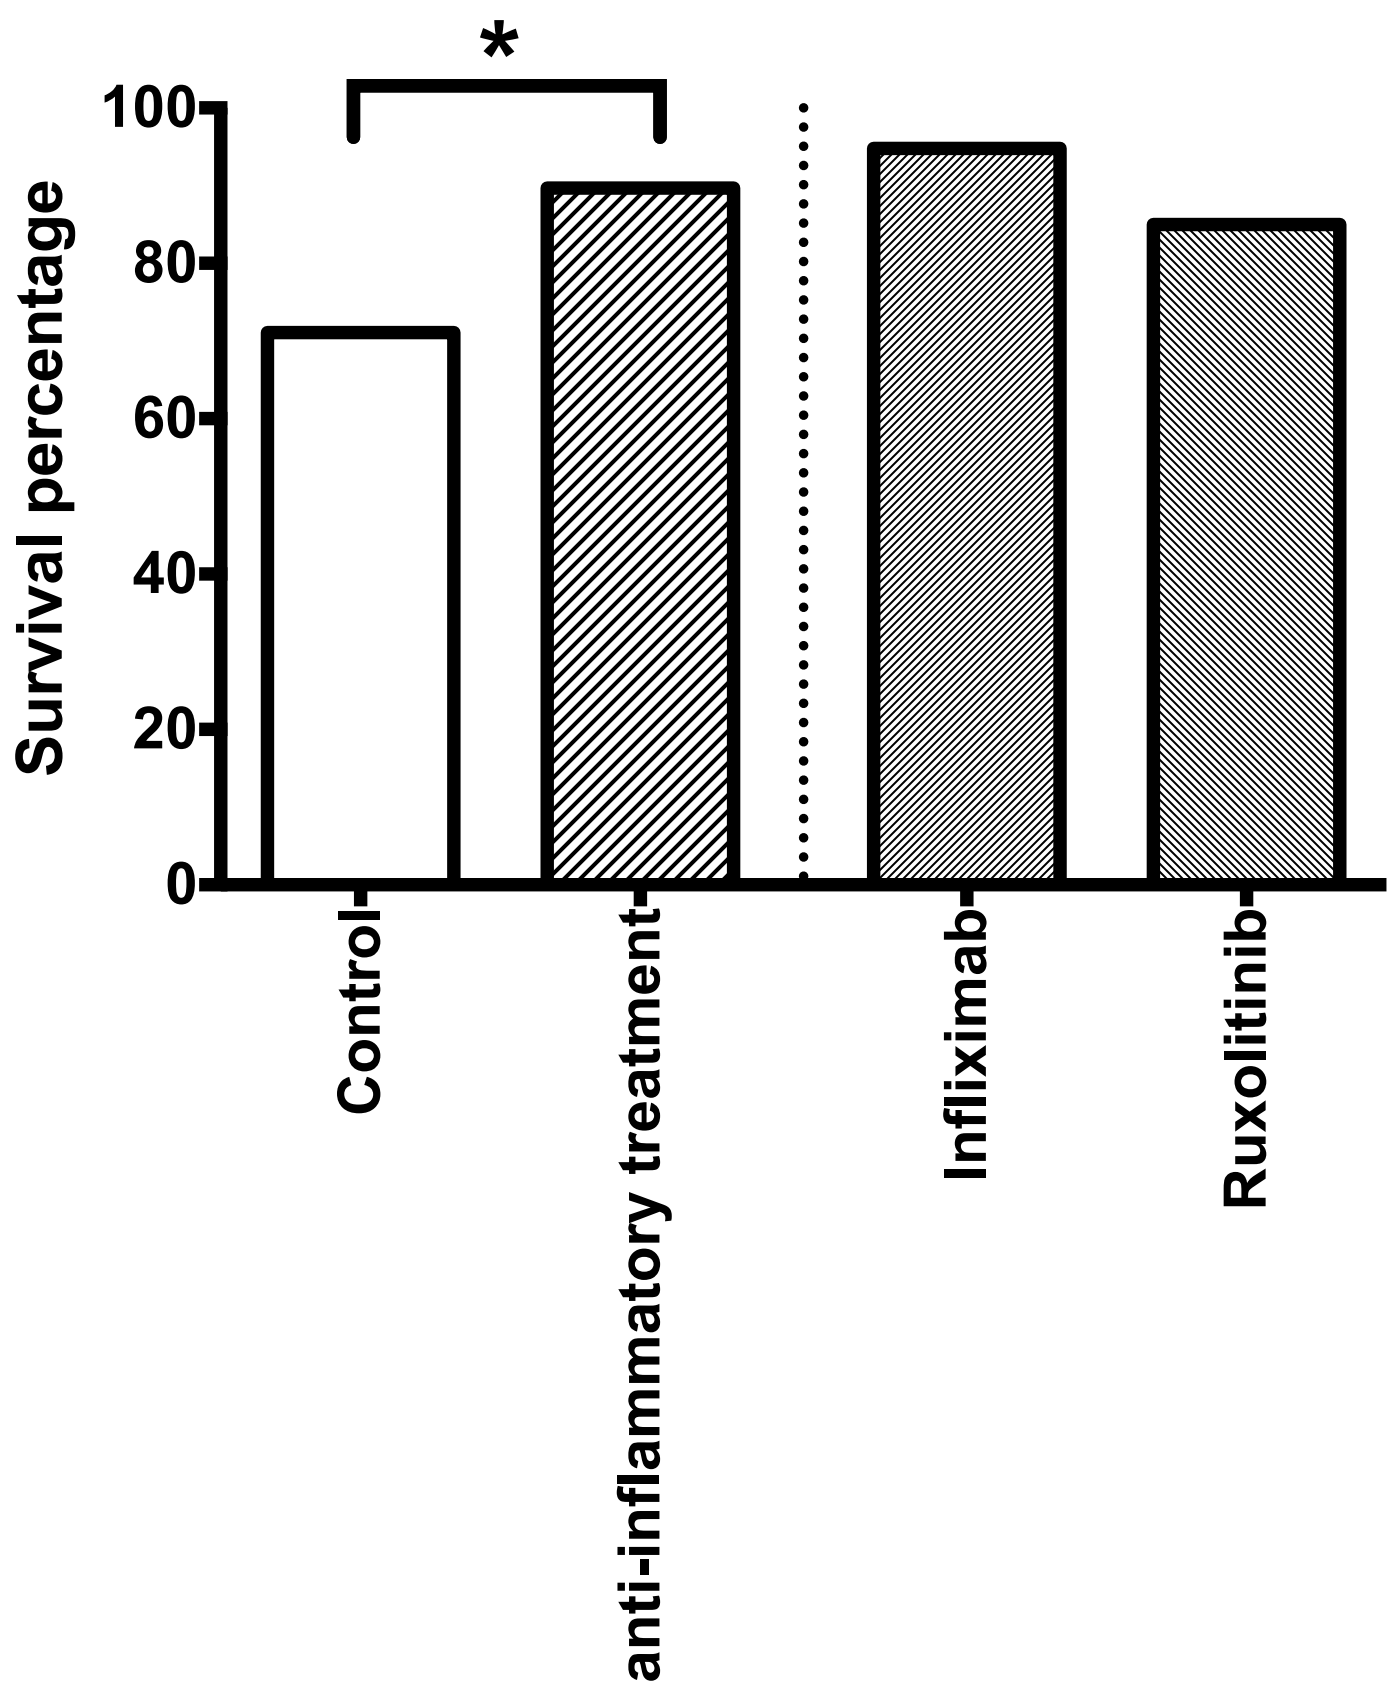

Supplement: 41375_2021_1411_MOESM1_ESM.pdf [file 41375_2021_1411_MOESM1_ESM.pdf]
